# Supplementary material for: JP3, an antiangiogenic peptide, inhibits growth and metastasis of gastric cancer through TRIM25/SP1/MMP2 axis
Source: Springer Nature journal article supplement (doi:10.1186/s13046-020-01617-8), 2020-06-23
Supplement: MOESM1 [file 18112506]

---

| Name   | Amino Acid Sequence (N-C)             |
|--------|---------------------------------------|
| Ctrl-P | Ac-EEMQRR-NH <sub>2</sub>             |
| JP3-1  | Ac-RMKKRY(-p)PTTFVMVV-NH <sub>2</sub> |
| JP3-3  | Ac-RMKKRYPTT(-p)FVMVV-NH <sub>2</sub> |
| JP5    | Ac-IGLKRT(-p)PMGIV-NH <sub>2</sub>    |

---
