# Supplementary material for: JP3, an antiangiogenic peptide, inhibits growth and metastasis of gastric cancer through TRIM25/SP1/MMP2 axis
Source: Springer Nature journal article supplement (doi:10.1186/s13046-020-01617-8), 2020-06-23

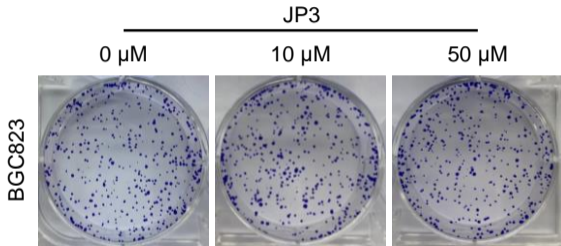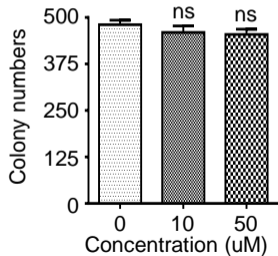

Supplement: MOESM3 [file 18112506]
