# Supplementary material for: JP3, an antiangiogenic peptide, inhibits growth and metastasis of gastric cancer through TRIM25/SP1/MMP2 axis
Source: Springer Nature journal article supplement (doi:10.1186/s13046-020-01617-8), 2020-06-23
Supplement: MOESM5 [file 18112506]

**a**BGC823  
IP:SP1

IB Ubiquitin:

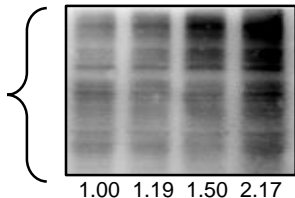

1.00 1.19 1.50 2.17

WCL

SP1

MMP2

Actin

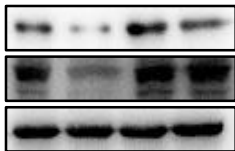

|                  |   |   |   |   |
|------------------|---|---|---|---|
| JP3 (50 $\mu$ M) | - | + | - | + |
| His-ub           | + | + | + | + |
| MG132            | - | - | + | + |

**b**Relative level  
.(% control)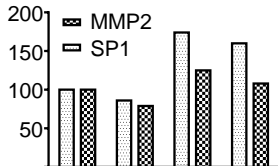

|                  |   |   |   |   |
|------------------|---|---|---|---|
| JP3 (50 $\mu$ M) | - | + | - | + |
| His-ub           | + | + | + | + |
| MG132            | - | - | + | + |
