# Supplementary material for: JP3, an antiangiogenic peptide, inhibits growth and metastasis of gastric cancer through TRIM25/SP1/MMP2 axis
Source: Springer Nature journal article supplement (doi:10.1186/s13046-020-01617-8), 2020-06-23
Supplement: MOESM11 [file 18112506]

|           | JP3-TRIM25                                                              | JP3-MEK1/2                                                                                        |
|-----------|-------------------------------------------------------------------------|---------------------------------------------------------------------------------------------------|
| Ionic     | Arg5-Asp142                                                             | Arg1-Asp315                                                                                       |
| Pipistack | His19-His109; Trp20-His109; Trp20-Phe135;<br>Phe10-His183; Phe22-His183 | NA                                                                                                |
| Hbond     | Phe22-Lys112; Trp20-Asp136; Tyr6-Phe140;<br>Arg5-Asp142; His19-Gln58    | Thr9-His308                                                                                       |
| VDW       | Thr9-Leu180                                                             | Met2-Gln236; Phe10-Ser18; Phe10-Gly237; Met12-<br>His239; Thr8-His308; Phe10-Val305; Phe22-Ser306 |
