# Supplementary material for: JP3, an antiangiogenic peptide, inhibits growth and metastasis of gastric cancer through TRIM25/SP1/MMP2 axis
Source: Springer Nature journal article supplement (doi:10.1186/s13046-020-01617-8), 2020-06-23
Supplement: MOESM12 [file 18112506]

| Name       | Atoms | Amino acids | Electrostatic values |
|------------|-------|-------------|----------------------|
| Non(p)-JP3 | N     | 9Thr        | -0.4                 |
|            | CA    | 9Thr        | 0                    |
|            | C     | 9Thr        | 0.55                 |
|            | O     | 9Thr        | -0.55                |
|            | CB    | 9Thr        | 0                    |
|            | CG2   | 9Thr        | 0                    |
|            | OG1   | 9Thr        | -0.49                |
|            | H     | 9Thr        | 0.4                  |
|            | HA    | 9Thr        | 0                    |
|            | HG22  | 9Thr        | 0                    |
|            | HG21  | 9Thr        | 0                    |
|            | HB    | 9Thr        | 0                    |
|            | HG23  | 9Thr        | 0                    |
| HG1        | 9Thr  | 0.49        |                      |
| TRIM25     | N     | 12Ser       | -0.4                 |
|            | CA    | 12Ser       | 0                    |
|            | C     | 12Ser       | 0.55                 |
|            | O     | 12Ser       | -0.55                |
|            | H     | 12Ser       | 0.4                  |
|            | HA    | 12Ser       | 0                    |
|            | CB    | 12Ser       | 0                    |
|            | HB3   | 12Ser       | 0                    |
|            | HB2   | 12Ser       | 0                    |
|            | OG    | 12Ser       | -0.49                |
| HG         | 12Ser | 0.49        |                      |
