# Supplementary material for: JP3, an antiangiogenic peptide, inhibits growth and metastasis of gastric cancer through TRIM25/SP1/MMP2 axis
Source: Springer Nature journal article supplement (doi:10.1186/s13046-020-01617-8), 2020-06-23
Supplement: MOESM13 [file 18112506]

---

**TRIM25****SP1****1 2 3 4 6 8 9 12**

---

**1****2****3****4****6****8****9****12**

---

**1****1****1****1****1****1****1****2****3****2****5****4****4****1****2****2****7****2****10****5****2****3****3****8****6****3****4****2****2****1**

---
